# Supplementary material
Source: publisher figshare collection journal article supplement (https://gsajournals.figshare.com/articles/dataset/_/8079953)
Supplement: Supplementary file 1 [file 1]

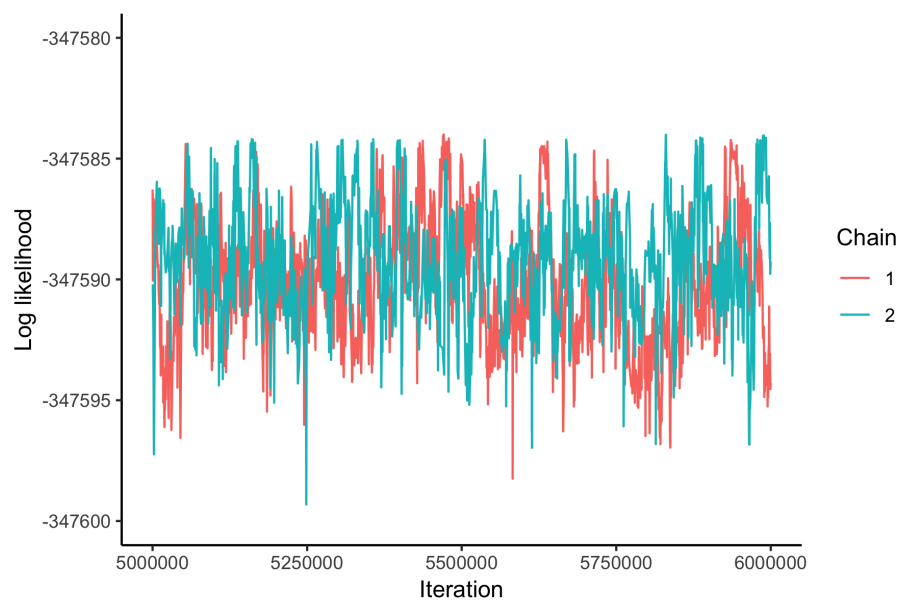

**Figure S2** Likelihood trace of two independent MCMC chains for the last million iterations for a dataset in Simulation A. Both chains fluctuate in a similar, stable range of log likelihood values.
