# Supplementary material
Source: publisher figshare collection journal article supplement (https://gsajournals.figshare.com/articles/dataset/_/8079953)
Supplement: Supplementary file 2 [file 1]

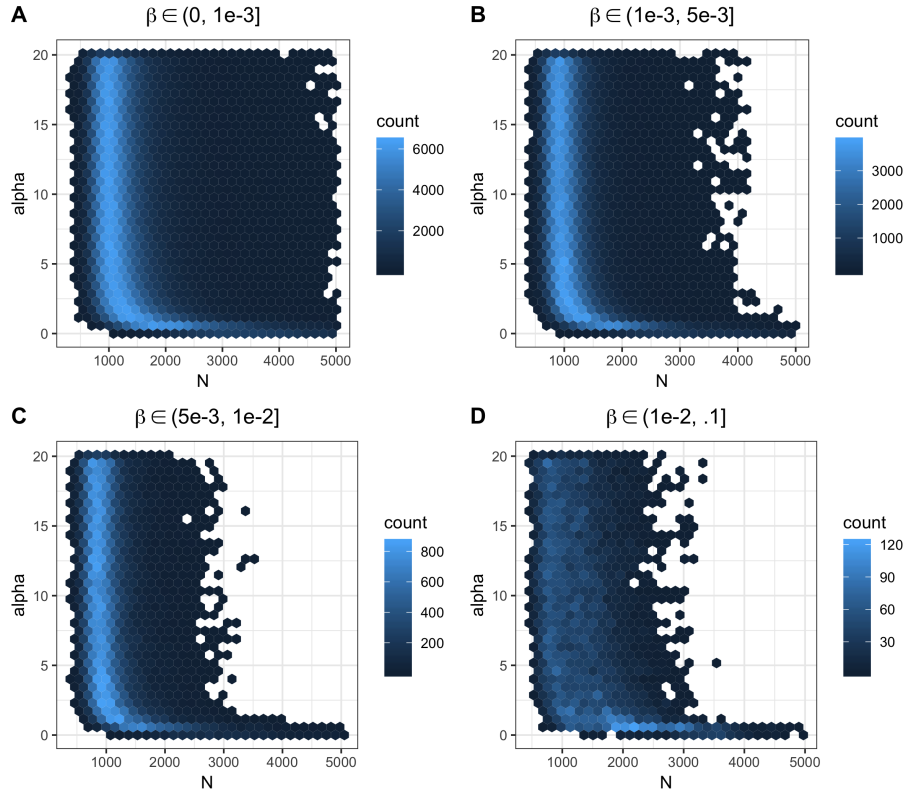

**Figure S1** Each panel represents a heatmap of  $\alpha$  and  $N$  for some fixed values of  $\beta$ , indicated on the top of each panel. The plots were generated from the MCMC samples aggregated over all 50 datasets in Simulation A.
