# Supplementary material
Source: publisher figshare collection journal article supplement (https://gsajournals.figshare.com/articles/dataset/_/8079953)
Supplement: Supplementary file 3 [file 1]

## Parameters Used For Running COLONY

### Parameters for Testing Simulation A (10K SNPs)

'filename' !Dataset name  
'filename' !Output file name  
50 ! Number of offspring in the sample  
10000 ! Number of loci  
1234 ! Seed for random number generator  
1 ! 0/1=Not updating/updating allele frequency  
2 ! 2/1=Dioecious/Monoecious species  
0 ! 0/1=No inbreeding/inbreeding  
0 ! 0/1=Diploid species/HaploDiploid species  
0 0 ! 0/1=Polygamy/Monogamy for males & females  
0 ! 0/1=Clone inference =No/Yes  
0 ! 0/1=Full sibship size scaling =No/Yes  
0 ! 0,1,2,3=No,weak,medium,strong sibship size prior; mean paternal & maternal  
sibship size  
0 ! 0/1=Unknown/Known population allele frequency  
1 ! Number of runs  
2 ! Length of run  
0 ! 0/1=Monitor method by Iterate#/Time in second  
100000 ! Monitor interval in Iterate# / in seconds  
0 ! non-Windows version  
1 ! 0/1 pairwise/Fulllikelihood  
2 ! 1/2/3=low/medium/high Precision for Fulllikelihood  
m@ !Marker names  
0@ !Marker types, 0/1 = codominant/dominant  
0@ !Allelic dropout rate  
0.01@ !false allele rate  
0 0 !prob. of dad/mum included in the candidates  
0 0 !numbers of candidate males & females  
0 0 !#known father-offspring dyads, paternity exclusion threshold  
0 0 !#known mother-offspring dyads, maternity exclusion threshold  
0 !#known paternal sibship with unknown fathers  
0 !#known maternal sibship with unknown mothers  
0 !#known paternity exclusions  
0 !#known maternity exclusions  
0 !#known paternal sibship exclusions  
0 !#known maternal sibship exclusions

### Parameters for Testing Simulation B (20 Microsatellites)

The parameters were the same as they were for Simulation A, except the number of loci was set to 20 and the allele dropout rate was set to 0.05.
