# Supplementary material
Source: publisher figshare collection journal article supplement (https://gsajournals.figshare.com/articles/dataset/_/8079953)
Supplement: Supplementary file 5 [file 1]

## Performance of MCMC Method on Simulated Data with $N_e = 958$

Table 1 shows the pairwise prediction accuracy for a simulation where  $\alpha = 15$ ,  $\beta = .1$ ,  $N = 1000$ , and  $n = 50$ . The mating parameters used here translate to  $N_e$  of 958. The pairwise accuracy rates were similar to those of Simulation A, where  $N_e = 650$ . Furthermore, Figure 1 shows that the posterior for  $N_e$  was centered around the true value at 958 (red vertical line).

Table 1: **Pairwise Prediction Accuracy**

|      |    | Predicted |     |       |    |     |
|------|----|-----------|-----|-------|----|-----|
|      |    | FS        | HS  | UR    | FC | HC  |
| True | FS | 4         | 0   | 0     | 0  | 0   |
|      | HS | 1         | 255 | 0     | 0  | 0   |
|      | UR | 0         | 0   | 60016 | 0  | 5   |
|      | FC | 1         | 0   | 0     | 12 | 0   |
|      | HC | 0         | 0   | 5     | 6  | 945 |

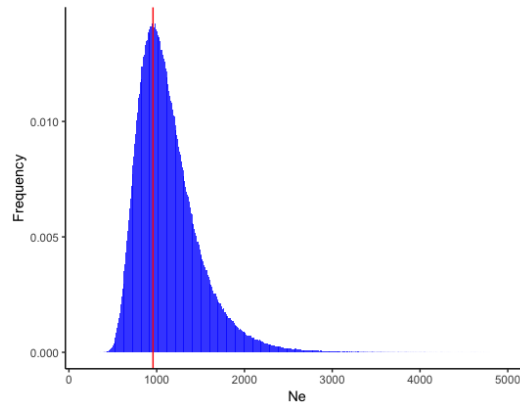

Figure 1: Estimated posterior distribution of  $N_e$  from MCMC samples aggregated over 50 datasets. The red line indicates the true value at  $N_e = 958$ .
